# Supplementary material
Source: MDPI journal article supplement (https://www.mdpi.com/2073-4395/13/7/1954)
Supplement: s1 [file s1]

Archive with 5 entries (5 files):
- Figure S1.pdf
- Figure S2.pdf
- Figure S3.pdf
- Video S1.mp4
- Video S2.mp4
